# Supplementary material for: Direct conversion of cellulose into C6 alditols over Ru/C combined with H+-released boron phosphate in an aqueous phase
Source: Royal Society of Chemistry journal article supplement (doi:10.1039/c4ra10834e), 2014-01-01
Supplement: c4ra10834e1.pdf [file c4ra10834e1.pdf]

### 1. Formulae:

$$\text{Cellulose conversion (\%)} = \frac{m_{\text{initial}} - m_{\text{left}}}{m_{\text{initial}}} \times 100\%$$

Where,  $m_{\text{initial}}$  denotes the weight of cellulose before reaction,  $m_{\text{left}}$  denotes the weight of cellulose after reaction.

$$\text{Yield (\%)} = \frac{n_{\text{product}}}{n_{\text{initial}}} \times 100\%$$

Where,  $n_{\text{initial}}$  denotes the carbon moles of cellulose before reaction,  $n_{\text{product}}$  denotes the carbon moles of the product.

$$\text{Selectivity (\%)} = \frac{Y_{\text{product}}}{\text{Cellulose conversion}} \times 100\%$$

Where  $Y_{\text{product}}$  denotes the yield of the product.

### 2. Figures and table

An 883 Basic IC (ion chromatograph) worked with a Metrisep A Supp4-250/4.0 column was used to detect the presence of  $\text{PO}_4^{3-}$  and  $\text{H}_3\text{BO}_3$ . The mobile phase was a mixed solution of 1.7 mM  $\text{NaHCO}_3$  and 1.8 mM  $\text{Na}_2\text{CO}_3$  and the flow rate was  $1.0 \text{ mL} \cdot \text{min}^{-1}$ . A S4800 instrument was used to record the SEM images, which was operated at 10 KV. An XPert Pro MPD (Philip) instrument with  $\text{Cu K}\alpha$  ( $\lambda=0.15406 \text{ nm}$ ) was used to measure the X-ray powder diffraction (XRD) patterns of the BP. An ASIQUACIV200-2 automatic physical/chemical adsorption analyzer was used to conduct ammonia temperature programmed desorption tests of additives.

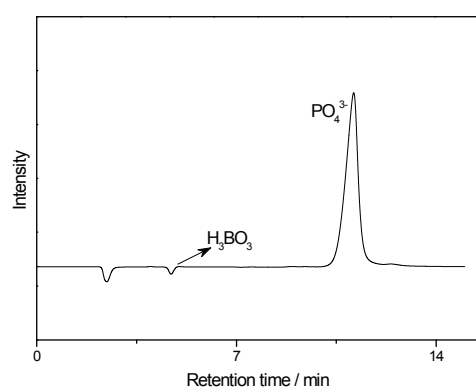

**Fig. S1** The ion chromatography of the diluted hydrolysis solution of boron phosphate.

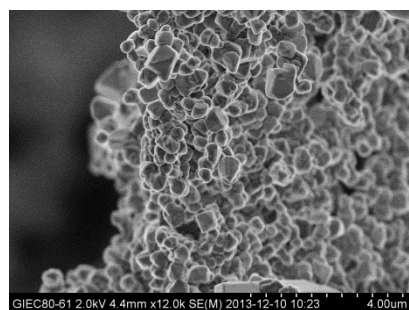

**Fig. S2** SEM micrographs of boron phosphate.

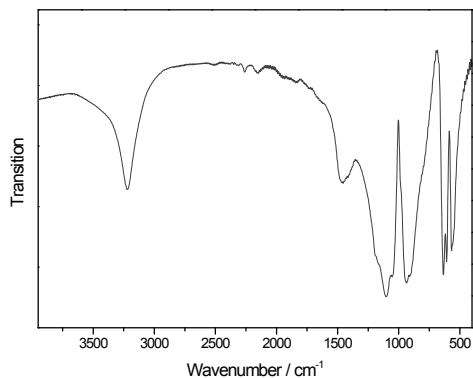

**Fig. S3** FT-IR spectrum of boron phosphate.

The FT-IR spectrum was assigned as follows.<sup>1-3</sup> The band at  $3221\text{ cm}^{-1}$  belongs to the stretching modes of O-H groups of strongly adsorbed water. The peak of  $1455\text{ cm}^{-1}$  belongs to the free boric acid stretching. Stretching bands of  $\nu(\text{BO}_4)$  and  $\nu(\text{PO}_4)$  appear at  $1103\text{ cm}^{-1}$  and  $936\text{ cm}^{-1}$ , respectively. The deformation band of O-B-O appears at  $620\text{ cm}^{-1}$ . But the high calcination temperature resulted in that the peak split into two bands at  $634\text{ cm}^{-1}$  and  $607\text{ cm}^{-1}$ . The peak at  $567\text{ cm}^{-1}$  ascribes to the deformation band of O-P-O.

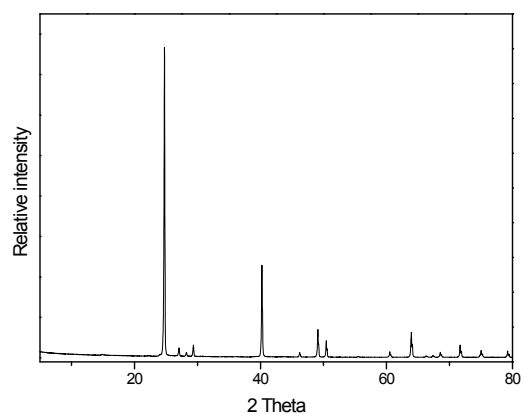

**Fig. S4** The X-Ray Powder diffraction pattern of boron phosphate.

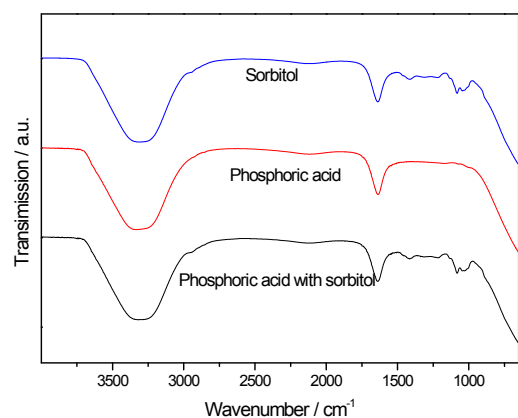

**Fig. S5** FT-IR spectra of 25 wt% sorbitol aqueous solution, 5 wt%  $\text{H}_3\text{PO}_4$  aqueous solution, and 5 wt%  $\text{H}_3\text{PO}_4$ -25 wt % sorbitol aqueous solution.

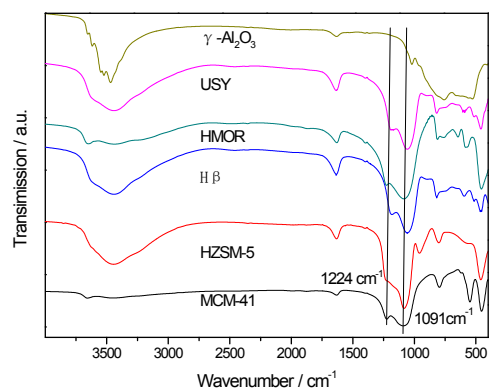

**Fig. S6** FT-IR spectra of silica-alumina materials.

**Table S1** Physicochemical property of the catalysts

| Co-catalyst                      | BET surface area / m <sup>2</sup> ·g <sup>-1</sup> | Average pore diameter / nm | Acidity density / mmol·g <sup>-1</sup> |
|----------------------------------|----------------------------------------------------|----------------------------|----------------------------------------|
| MCM-41                           | 309.8                                              | 2.5                        | 0.04                                   |
| HZSM-5                           | 392.8                                              | 3.5                        | 1.19                                   |
| γ-Al <sub>2</sub> O <sub>3</sub> | 200.6                                              | 1.4                        | 1.85                                   |
| Hβ                               | 583.1                                              | 0.5                        | 1.24                                   |
| HMOR                             | 431.4                                              | 0.6                        | 1.15                                   |
| USY                              | 651.1                                              | 3.1                        | 0.83                                   |
| BP                               | 16.6                                               | 42.4                       | 1.45                                   |

**Table S2** Conversion of cellulose over Ru/C and/or different additives.<sup>a</sup>

| Entry | Additive                         | Cellulose conversion/% | Product yield/%         |                                |                     |
|-------|----------------------------------|------------------------|-------------------------|--------------------------------|---------------------|
|       |                                  |                        | C <sub>6</sub> alditols | Others in aqueous <sup>b</sup> | In gas <sup>c</sup> |
| 1     | -                                | 6.3                    | 1.4                     | 0.1                            | 4.7                 |
| 2     | MCM-41                           | 17.7                   | 12.9                    | 3.9                            | 0.4                 |
| 3     | HZSM-5                           | 16.8                   | 12.2                    | 4.3                            | 0.2                 |
| 4     | Hβ                               | 14.5                   | 10.9                    | 3.1                            | 0.2                 |
| 5     | HMOR                             | 15.1                   | 11.3                    | 3.0                            | 0.6                 |
| 6     | USY                              | 12.8                   | 9.3                     | 2.5                            | 0.4                 |
| 7     | γ-Al <sub>2</sub> O <sub>3</sub> | 13.9                   | 10.5                    | 2.9                            | 0.5                 |

<sup>a</sup>Reaction conditions: 0.8 g cellulose, 0.1 g Ru/C, 0.2 g additive, 40 mL H<sub>2</sub>O, 5 MPa H<sub>2</sub> (RT), 463 K, 1 h. <sup>b</sup>Others in aqueous include isosorbide, cellobiose, and small polyols. <sup>c</sup>In gas: methane, ethane, and propane.

## References

1. P. Kmecl and P. Bukovec, *Acta Chim Slov*, 1999, **46**, 161-171.
2. Mitichen.Mg, Alshenav.Km and A. A. Kubasov, *J Appl Chem-Ussr+*, 1972, **45**, 455-&.
3. J. B. Moffat and J. F. Neeleman, *J Catal*, 1974, **34**, 376-389.
